# Supplementary material for: Dietary Fibre Intake Is Associated with Serum Levels of Uraemic Toxins in Children with Chronic Kidney Disease
Source: PubMed Central journal article supplement (PMC8003569; doi:10.3390/toxins13030225), 2021-03-19
Supplement: toxins-13-00225-s001.pdf [file toxins-13-00225-s001.pdf]

## Supplementary Materials: Dietary Fibre Intake is Associated with Serum Levels of Uraemic Toxins in Children with Chronic Kidney Disease

Amina El Amouri, Evelien Snauwaert, Aurélie Foulon, Charlotte Vande Moortel, Maria Van Dyck, Koen Van Hoeck, Nathalie Godefroid, Griet Glorieux, Wim Van Biesen, Johan Vande Walle, Ann Raes and Sunny Eloot

**Table S1.** Nutrient intake of patients across different CKD stages.

| Nutrient intake                           | CKD 1–2<br>(n = 20) | CKD 3<br>(n = 19) | CKD 4–5<br>(n = 22) | <i>p</i> |
|-------------------------------------------|---------------------|-------------------|---------------------|----------|
| Fibre intake<br>(g/day/m <sup>2</sup> )   | 15.8 ± 6.7          | 12.5 ± 6.9        | 9.9 ± 5.8           | 0.017°   |
| % DRI fibre                               | 91.7 ± 35.3         | 78.0 ± 32.3       | 60.0 ± 34.1         | 0.014°°  |
| Protein intake<br>(g/day/m <sup>2</sup> ) | 64.8 ± 39.7         | 52.9 ± 19.2       | 46.4 ± 19.7         | 0.104    |
| %DRI protein                              | 274 ± 196           | 202 ± 90          | 187 ± 93            | 0.101    |
| Protein/Fibre<br>index                    | 4.2 (3.2–4.7)       | 5.0 (2.7–6.2)     | 3.8 (2.8–6.1)*      | 0.552    |
| Energy<br>(kCal/day)                      | 1505 ± 478          | 1463 ± 491        | 1329 ± 546          | 0.503    |
| Energy<br>(kCal/kg/day)                   | 68.2 ± 35.4         | 50.5 ± 27.8       | 60.1 ± 27.9         | 0.204    |

%DRI: achieved percentage of the recommended 100% Dietary Reference Intake. Data are expressed as mean ± standard deviation (SD) or median (25th–75th percentile) as appropriate. \*n = 19, the three patients with a fibre intake of 0 g/day were excluded for mathematical reasons. ° Significantly higher fibre intake in CKD 1–2 patients versus CKD 4–5 patients (6 g/day/m<sup>2</sup>, 95%CI: 1–11 g, *p* = 0.012). °° Significantly higher %DRI for fibre intake in CKD 1–2 patients versus CKD 4–5 patients (32%, 95%CI: 7–57%, *p* = 0.010). Comparison between the CKD stages was done using a one-way ANOVA test with post-hoc Tukey comparison or a Kruskal–Wallis test with Bonferroni correction as appropriate.

**Table S2.** Serum concentrations of total and free gut-derived, protein-bound uraemic toxins in patients across different CKD stages.

| Gut-derived, protein-bound<br>uraemic toxins (mg/dL) | CKD 1–2<br>(n = 20) | CKD 3<br>(n = 19)   | CKD 4–5<br>(n = 22) |                     |
|------------------------------------------------------|---------------------|---------------------|---------------------|---------------------|
| <b>pCG</b>                                           | Total               | 0.001 (0.001–0.009) | 0.001 (0.001–0.008) | 0.017 (0.007–0.043) |
|                                                      | Free                | 0.001 (0.001–0.006) | 0.001 (0.001–0.007) | 0.015 (0.006–0.039) |
| <b>IAA</b>                                           | Total               | 0.032 (0.019–0.050) | 0.036 (0.028–0.051) | 0.062 (0.036–0.078) |
|                                                      | Free                | 0.002 (0.001–0.003) | 0.003 (0.002–0.006) | 0.008 (0.004–0.110) |
| <b>IxS</b>                                           | Total               | 0.082 (0.047–0.168) | 0.223 (0.102–0.264) | 0.573 (0.458–0.739) |
|                                                      | Free                | 0.003 (0.001–0.005) | 0.004 (0.001–0.007) | 0.019 (0.011–0.031) |
| <b>pCS</b>                                           | Total               | 0.250 (0.073–0.835) | 0.665 (0.352–0.860) | 1.569 (0.973–2.159) |
|                                                      | Free                | 0.008 (0.003–0.017) | 0.012 (0.006–0.021) | 0.043 (0.018–0.074) |

pCG: p-cresylglucuronide; IAA: indole acetic acid; IxS: indoxyl sulfate; pCS: p-cresyl sulfate. Data are expressed as median (25th–75th percentile).
